# Supplementary material for: Adaptation to chronic ER stress enforces pancreatic β-cell plasticity
Source: bioRxiv or medRxiv preprint supplement (doi:10.1101/2021.05.24.445193), 2021-05-24
Supplement: Supplementary file [file media-1.pdf]

# Supplementary Figure 1. Related to Figure 1.

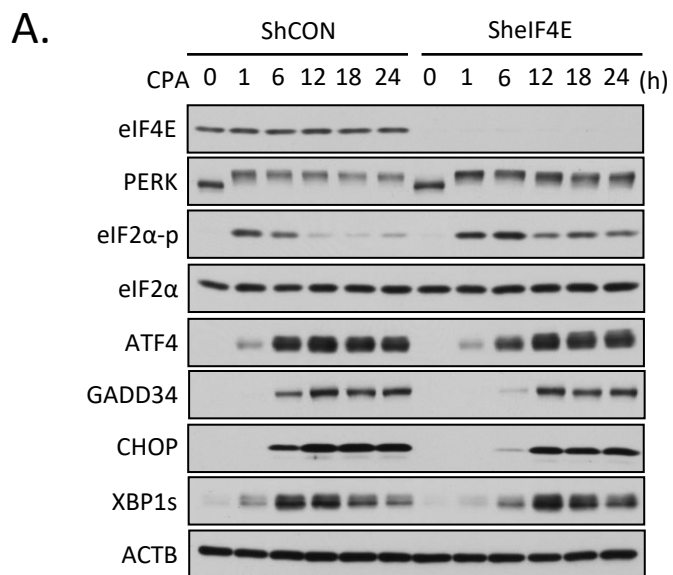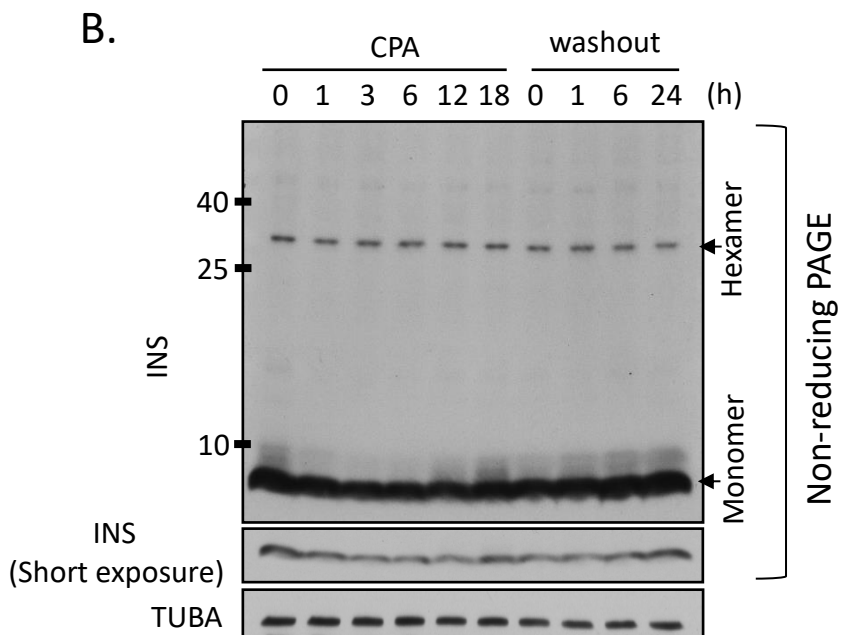

# Supplementary Figure 2. Related to Figure 3.

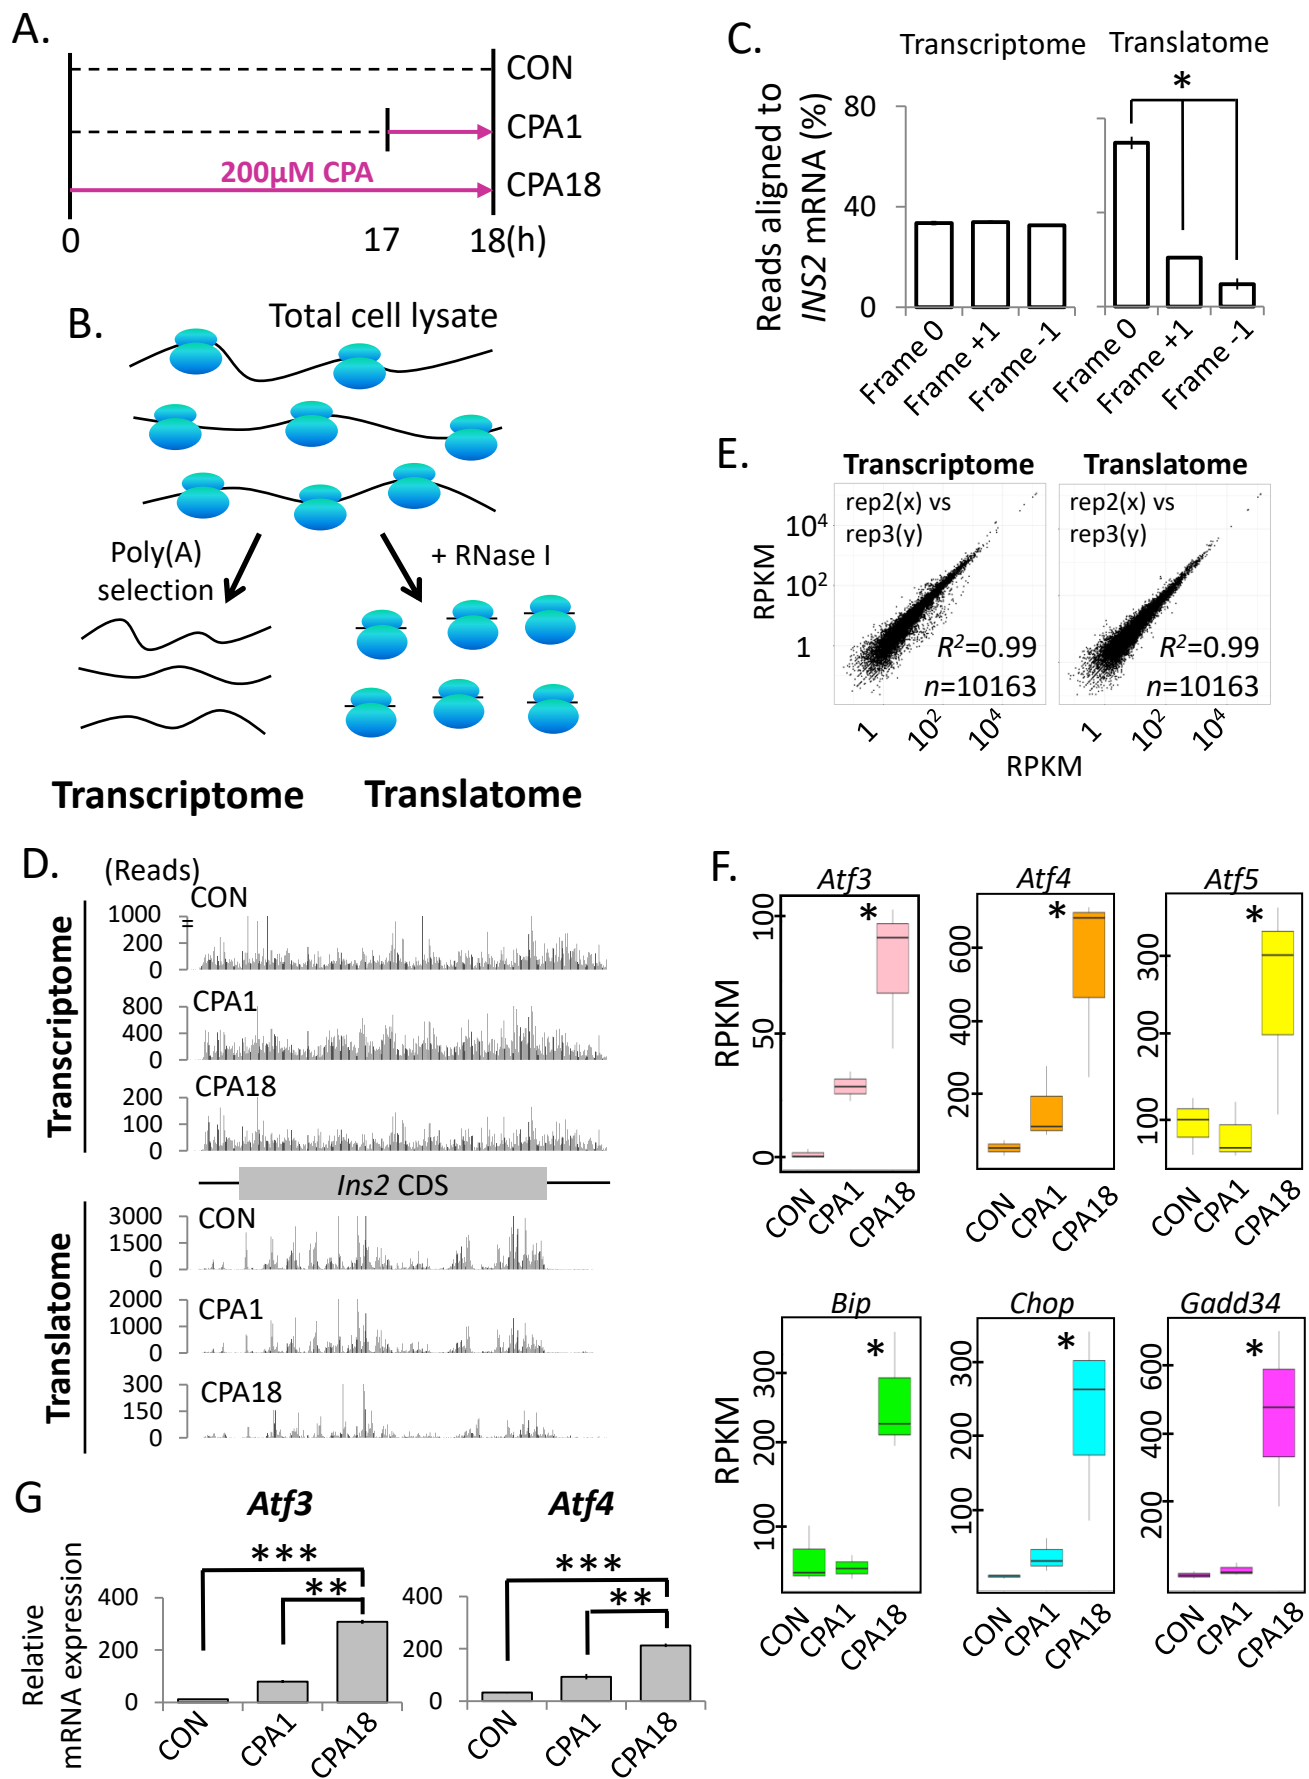

# Supplementary Figure 3. Related to Figure 4.

A.

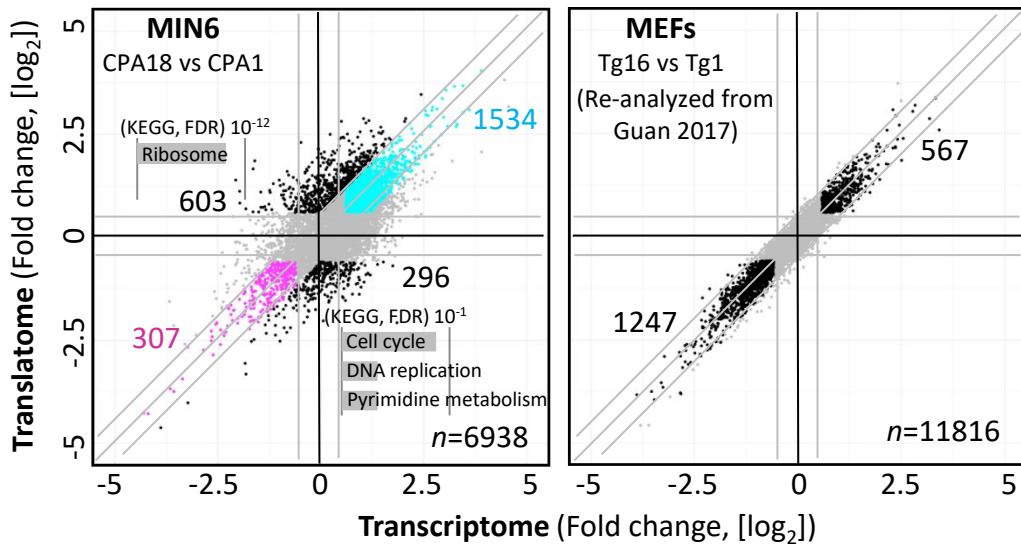

B.

Down-regulation during chronic adaptation

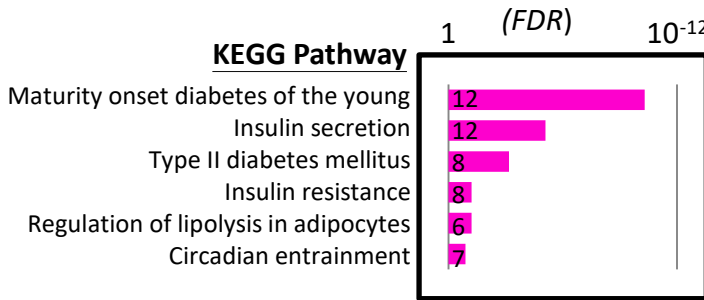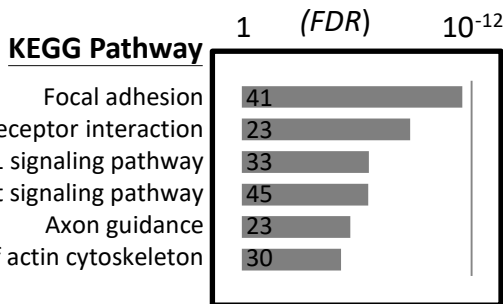

C.

Up-regulation during chronic adaptation

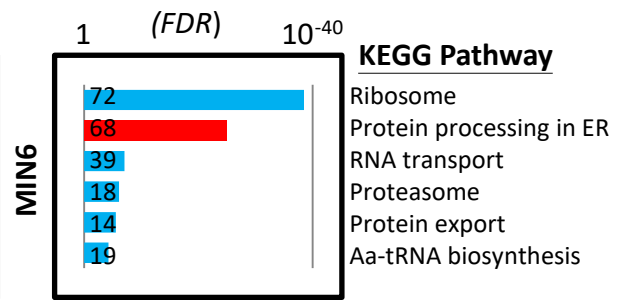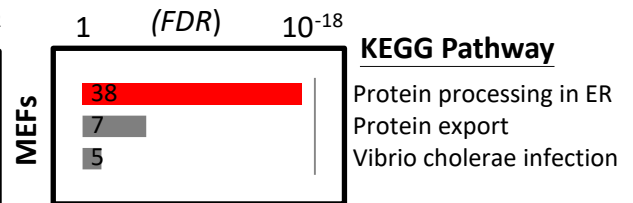

D.

**KEGG: Protein processing in ER -> Gene Ontology in Biological Process**

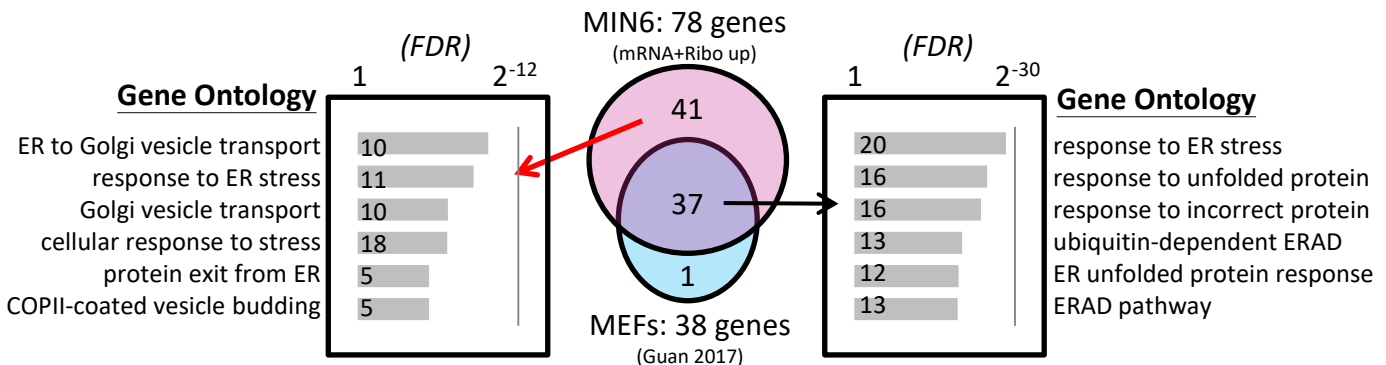

# Supplementary Figure 4. Related to Figure 6.

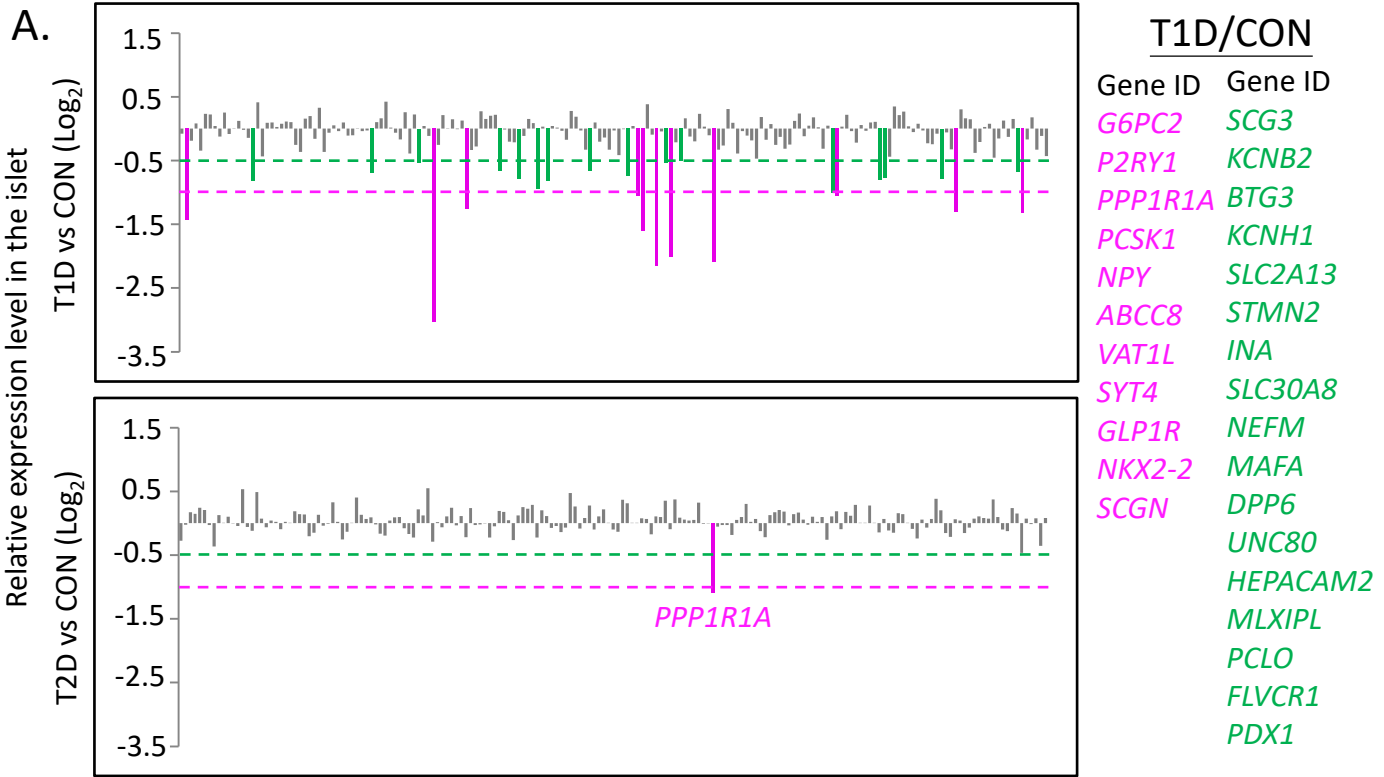

**B.**

| PancDB No. | Age | Sex | T1D duration | $\alpha$ cell (%) | $\beta$ cell (%) | $\delta$ cell (%) | Pp cell (%) | Acinar cell (%) | Duct cell (%) | Others (%)  |
|------------|-----|-----|--------------|-------------------|------------------|-------------------|-------------|-----------------|---------------|-------------|
| HPAP019    | 24  | M   | ND           | 874 (21.51)       | 1278 (31.45)     | 26 (0.64)         | 822 (20.23) | 613 (15.08)     | 249 (6.13)    | 202 (4.97)  |
| HPAP022    | 37  | F   | ND           | 511 (13.74)       | 1069 (28.75)     | 70 (1.88)         | 73 (1.96)   | 380 (10.22)     | 1097 (29.51)  | 518 (13.93) |
| HPAP024    | 18  | M   | ND           | 126 (6.78)        | 1106 (59.59)     | 278 (14.98)       | 50 (2.69)   | 165 (8.89)      | 24 (1.29)     | 107 (5.77)  |
| HPAP026    | 24  | M   | ND           | 200 (35.53)       | 94 (16.7)        | 60 (10.66)        | 37 (6.57)   | 66 (11.72)      | 49 (8.7)      | 57 (10.12)  |
| HPAP029    | 23  | M   | ND           | 440 (19.51)       | 423 (18.76)      | 352 (15.61)       | 75 (3.33)   | 192 (8.51)      | 406 (18)      | 367 (16.27) |
| HPAP020    | 14  | M   | 5 days       | 4319 (49.98)      | 1055 (12.21)     | 116 (1.34)        | 62 (0.72)   | 2229 (25.8)     | 629 (7.28)    | 231 (2.67)  |
| HPAP021    | 13  | F   | 7 years      | 1526 (32.18)      | 812 (17.12)      | 44 (0.93)         | 0 (0)       | 1780 (37.54)    | 509 (10.73)   | 71 (1.5)    |
| HPAP023    | 17  | F   | 7 years      | 300 (34.92)       | 86 (10.01)       | 10 (1.16)         | 1 (0.12)    | 215 (25.03)     | 171 (19.91)   | 76 (8.85)   |
| HPAP028    | 4   | M   | 3 years      | 861 (20.59)       | 1407 (33.64)     | 394 (9.42)        | 31 (0.74)   | 365 (8.73)      | 735 (17.58)   | 389 (9.3)   |
| HPAP032    | 10  | F   | 3 years      | 538 (22.63)       | 942 (39.67)      | 468 (19.69)       | 0 (0)       | 217 (9.13)      | 47 (1.98)     | 165 (6.94)  |
| HPAP055    | 24  | M   | 7 years      | 58 (3.25)         | 77 (4.32)        | 793 (44.5)        | 2 (0.11)    | 77 (4.32)       | 569 (31.93)   | 206 (11.56) |

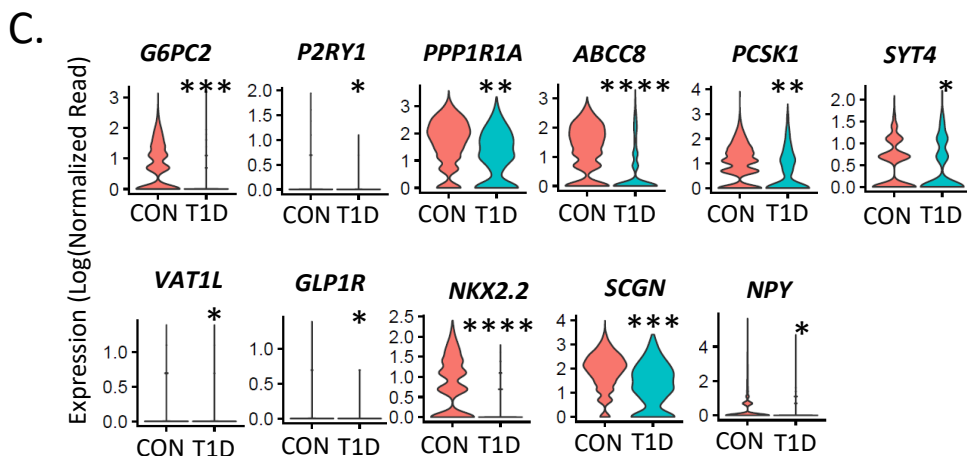

# Supplementary Figure 5. Related to Figure 7.

A.

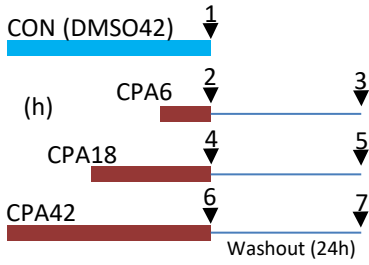

B.

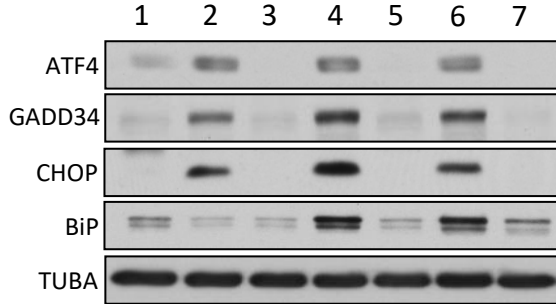

C.

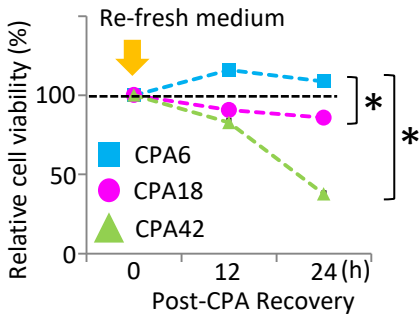

Supplementary Figure 6.

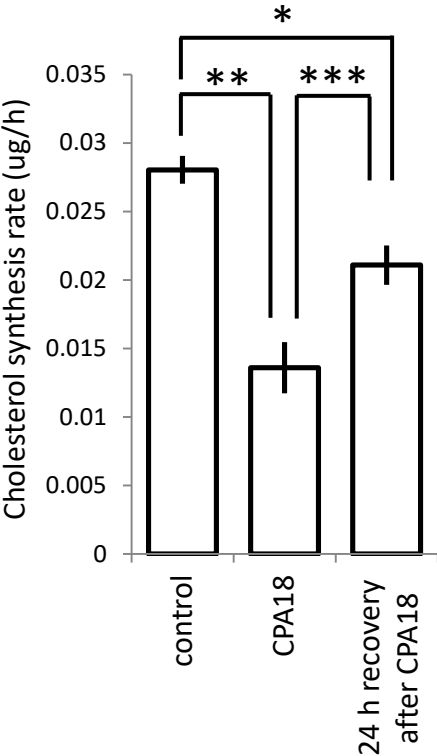

Supplementary Figure 7.

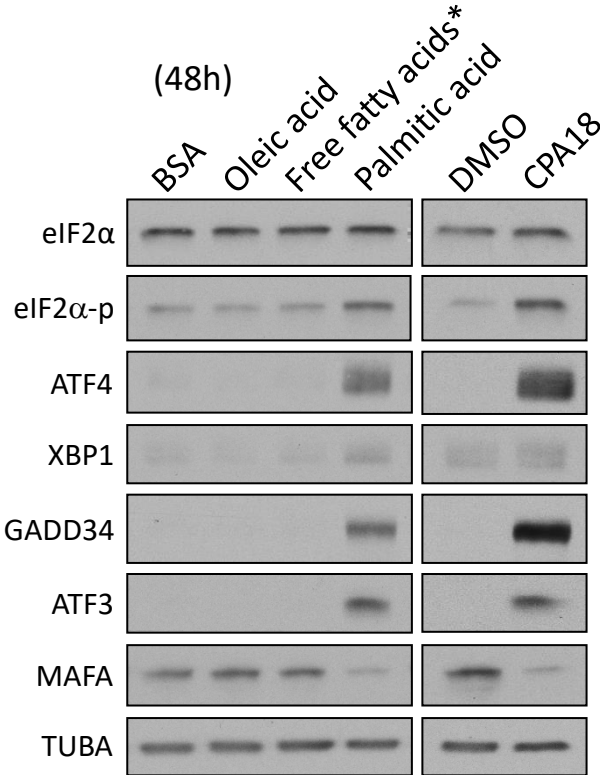

\*. Palmitic acid : Oleic acid = 2:1
